# Supplementary material
Source: Research Square preprint supplement (doi:10.21203/rs.3.rs-9348456/v1)
Supplement: Supplementary file 1 [file 12c8d345954e7221d55616e0.docx]

**Table 1** Factors correlated with patient survival in gastric cancer: a multivariate Cox regression model for overall survival (OS) and disease‐free survival (DFS).

**
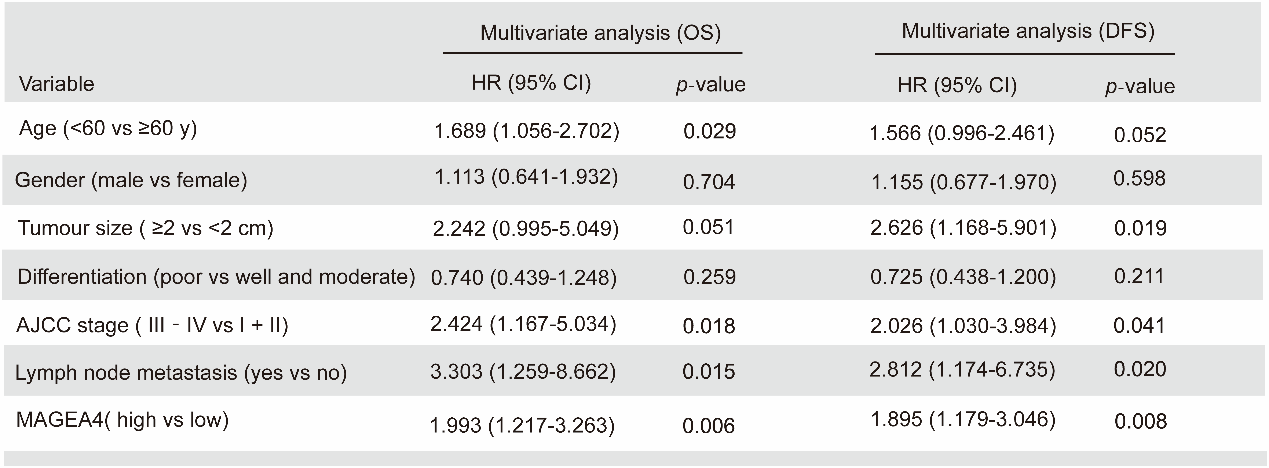
**
