# Supplementary material
Source: Research Square preprint supplement (doi:10.21203/rs.3.rs-9348456/v1)
Supplement: Supplementary file 3 [file c9763738eb79262a1e34314c.docx]

**Supplementary information for** **MAGEA4 promotes gastric cancer progression by inducing chromosomal instability through the STAU1/c-Myc axis**

**Supplementary Table S1. Antibodies used in this study**

| ANTIBODY | IDENTIFIER | SOURCE |
| --- | --- | --- |
| MAGEA4 | Cat#MG628817S | Absmart (China) |
| phosphorylated histone H2AX | Cat#9718S | Cell Signaling Technology (USA) |
| β-Tubulin | Cat#2146S | Cell Signaling Technology (USA) |
| β-actin | Cat#4967S | Cell Signaling Technology (USA) |
| STAU1 | Cat#89056T | Cell Signaling Technology (USA) |
| P53 | Cat#9282T | Cell Signaling Technology (USA) |
| c-Myc | Cat#9402S | Cell Signaling Technology (USA) |
| GAPDH | Cat#2118T | Cell Signaling Technology (USA) |
| α-tubulin | Cat#3873 | Cell Signaling Technology (USA) |
| Phospho-Histone H3 (Ser10) (D7N8E) XP | Cat#53348 | Cell Signaling Technology (USA) |

**Supplementary Table S2. Primers used in this study**

| Primer | Sequence (5' to 3') | SOURCE |
| --- | --- | --- |
| F-MAGEA4 | CCTCTGCCTTACCCACTACCA | General Biol (Anhui) Co., Ltd |
| R-MAGEA4 | CCTTGTTACTGAGTGCTTCTCG | General Biol (Anhui) Co., Ltd |
| F-GAPDH | TTCACCACCATGGAGAAGGC | General Biol (Anhui) Co., Ltd |
| R-GAPDH | GGCATGGACTGTGGTCATGA | General Biol (Anhui) Co., Ltd |
| F-STAU1 | GCCTGTTGACCCTTACTCTCG | General Biol (Anhui) Co., Ltd |
| R-STAU1 | TGGAAATGGGTAAAAGTACCTCG | General Biol (Anhui) Co., Ltd |
| F-c-Mcy | GGCTCCTGGCAAAAGGTCA | General Biol (Anhui) Co., Ltd |
| R-c-Myc | CTGCGTAGTTGTGCTGATGT | General Biol (Anhui) Co., Ltd |

**Supplementary Table S3.** **A correlation analysis between the expression of MAGEA4 and various clinicopathological features in 195 gastric cancer tissue samples.**

|  | MAGEA4 expression | | |  |
| --- | --- | --- | --- | --- |
| Parameters | Low (n = 128) | High (n =67) | | *p*-value |
| Age (y) | | | | |
| <60 | 78 | 34 | | 0.172 |
| ≥60 | 50 | 33 | |
| Gender | | | | |
| Male | 89 | 48 | | 0.759 |
| Female | 39 | 19 | |
| Tumour size (cm) | | | | |
| <2 | 38 | 19 | | 0.846 |
| ≥2 | 90 | 48 | |
| AJCC stage | | | | |
| I - II | 82 | 31 | | 0.017 |
| III - IV | 46 | 36 | |
| Differentiation | | | | |
| Well and moderate | 31 | 22 | 0.199 | |
| Poor | 97 | 45 |
| Lymph node metastasis | | | | |
| With (N1 + N2 + N3) | 65 | 45 | 0.028 | |
| Without (N0) | 63 | 22 |

**
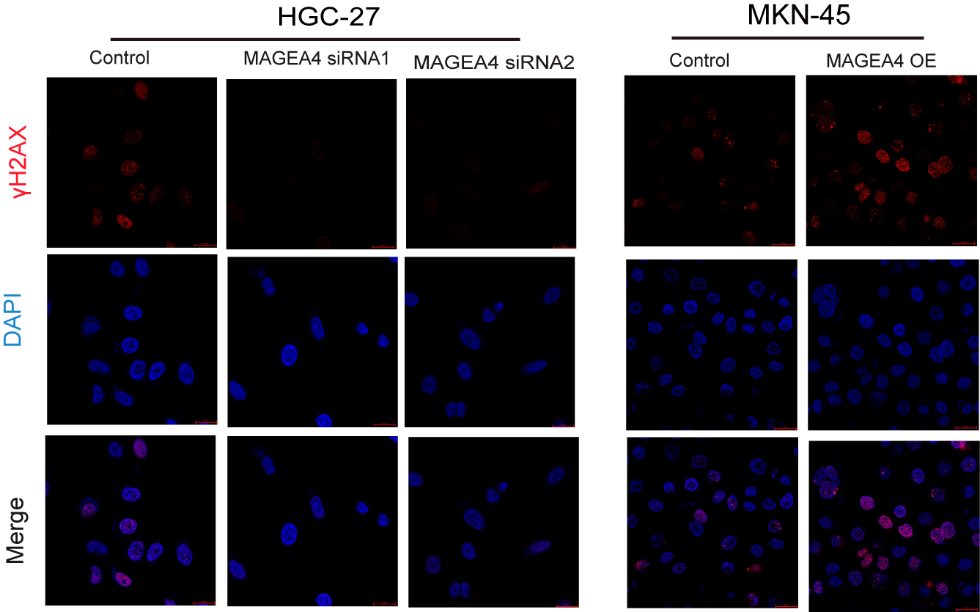
**

**Supplementary Figure S1.** Representative images of γH2AX foci following MAGEA4 knockdown or overexpression. Red is γH2AX staining, blue is DAPI staining of nuclei.

**
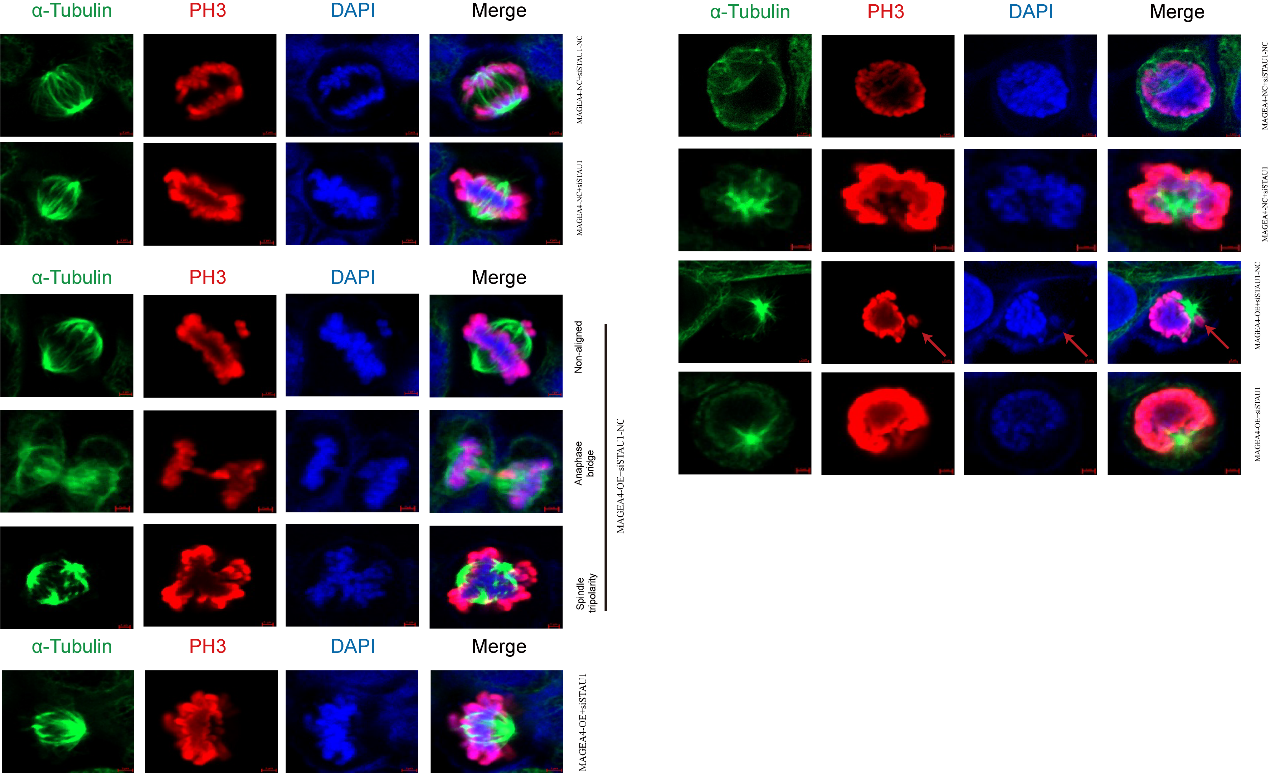
 Supplementary Figure S2.** Representative images of abnormal mitoses, multipolar mitoses, and micronuclei in MAGEA4-overexpressing and wild-type MKN-45 cells following STAU1 depletion. Staining: α-tubulin (green), PH3 (red), DAPI (blue).
