# Supplementary material
Source: Research Square preprint supplement (doi:10.21203/rs.3.rs-9348456/v1)

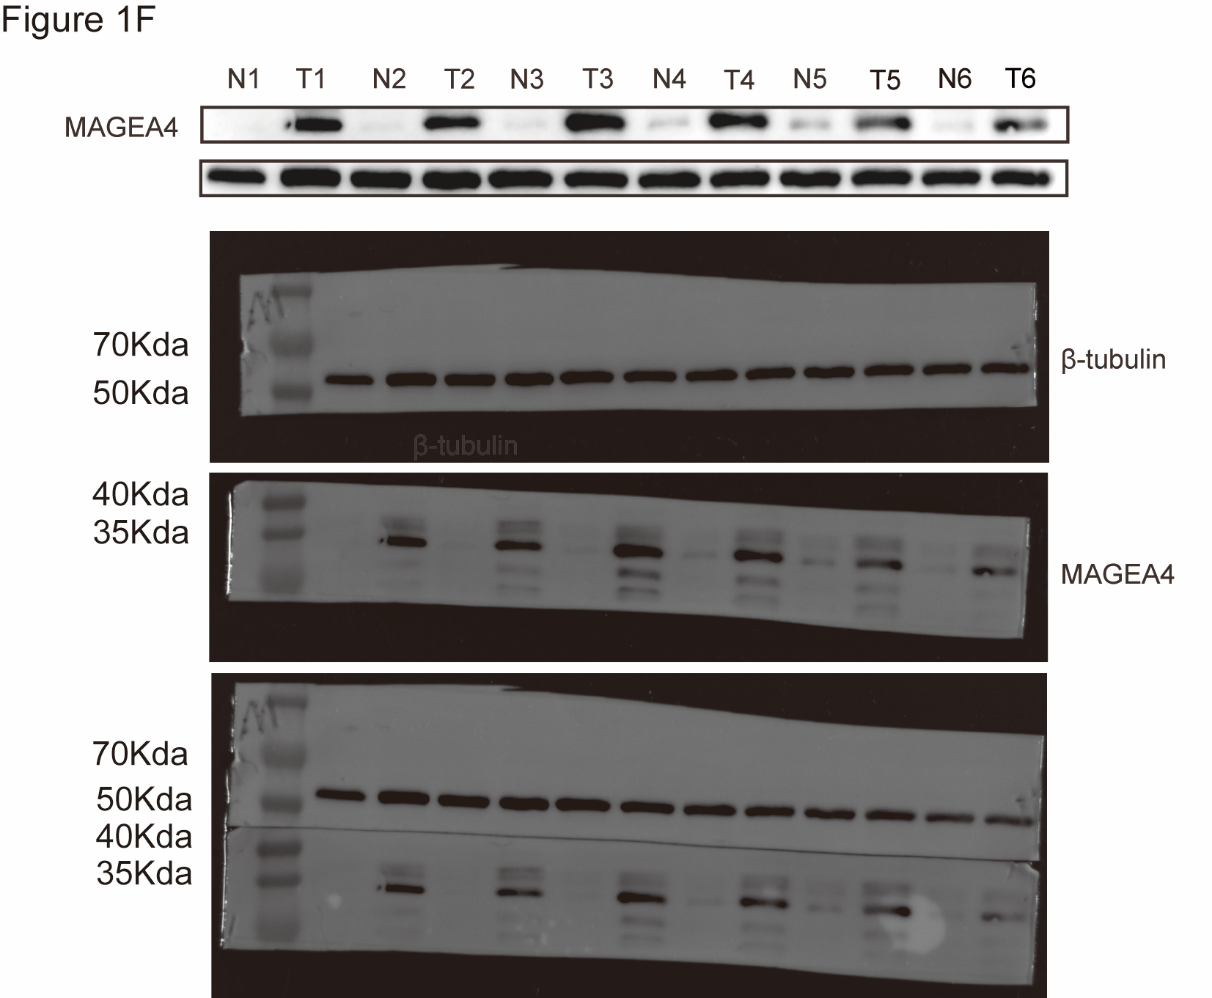

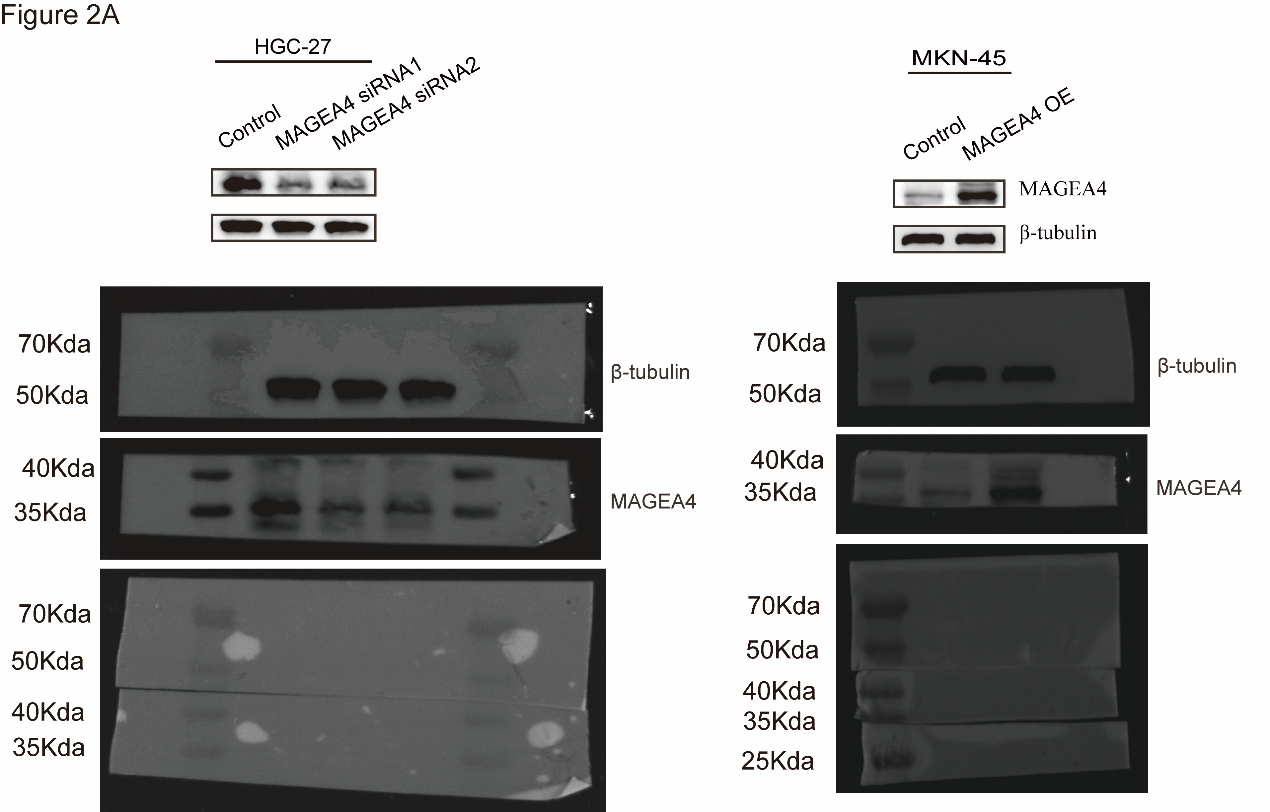

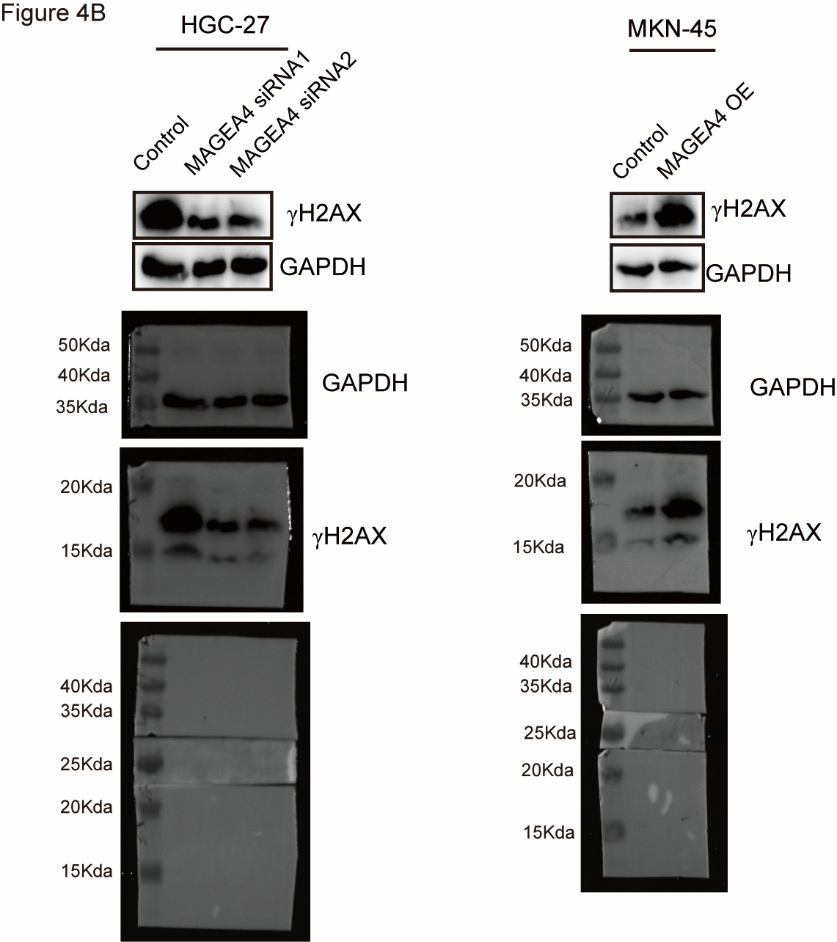

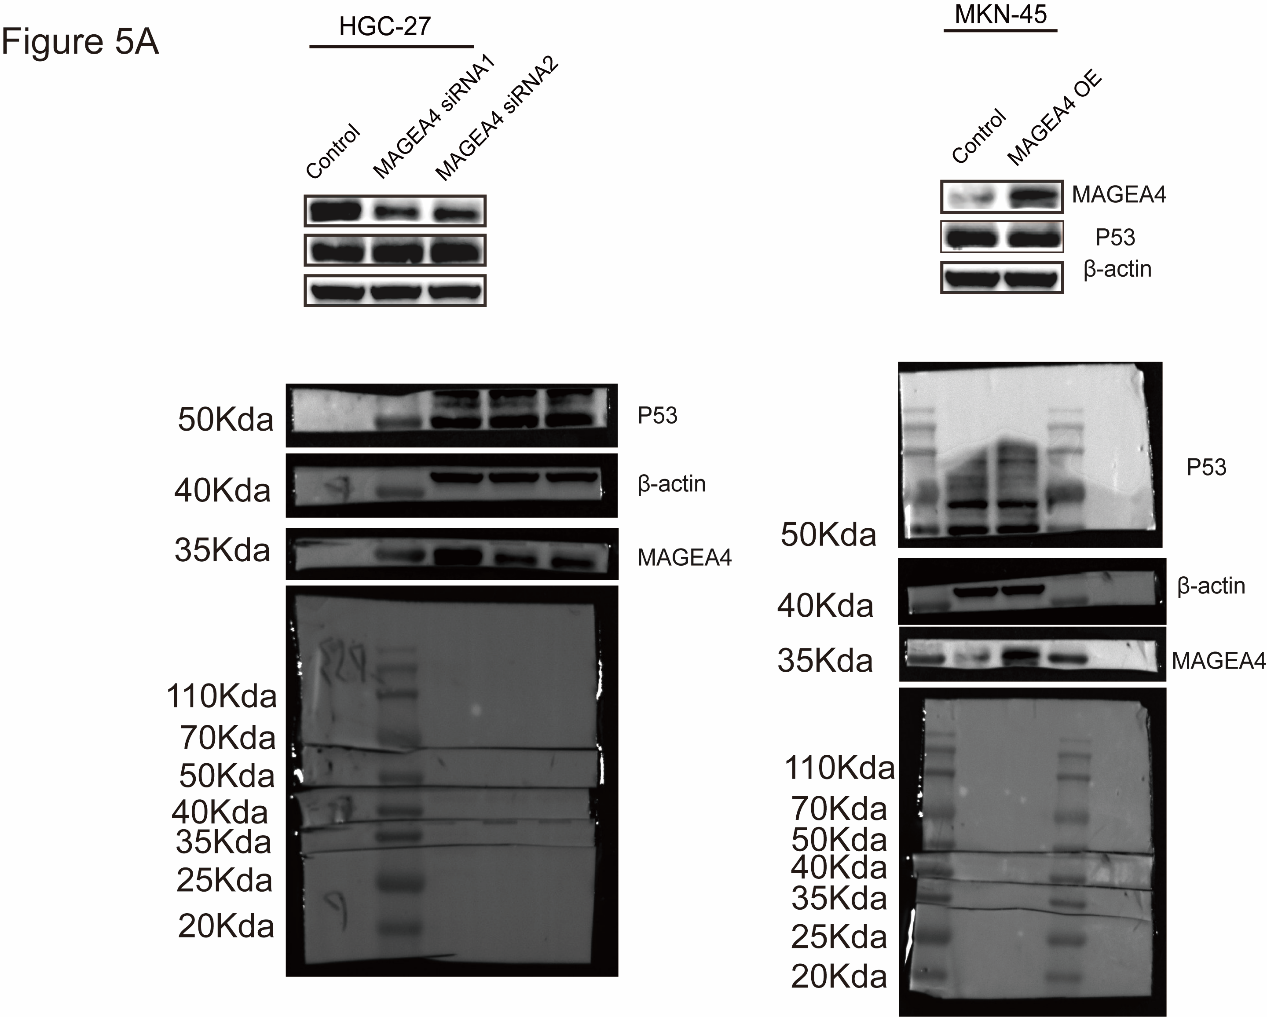

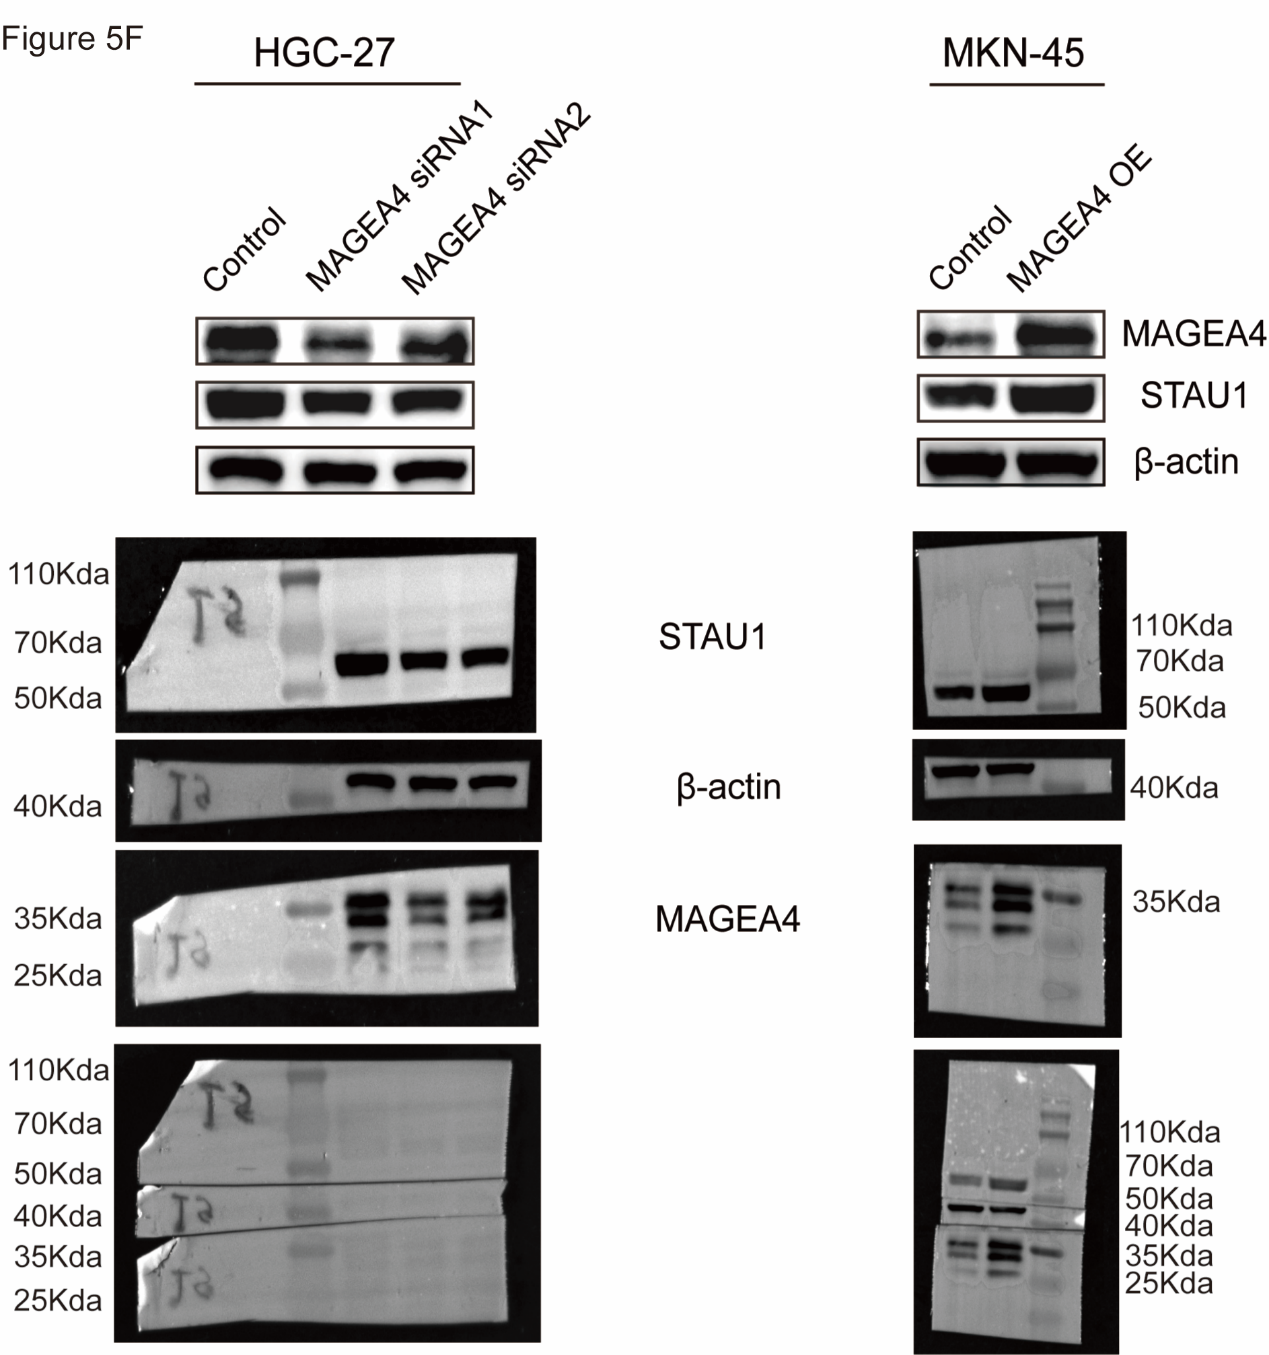


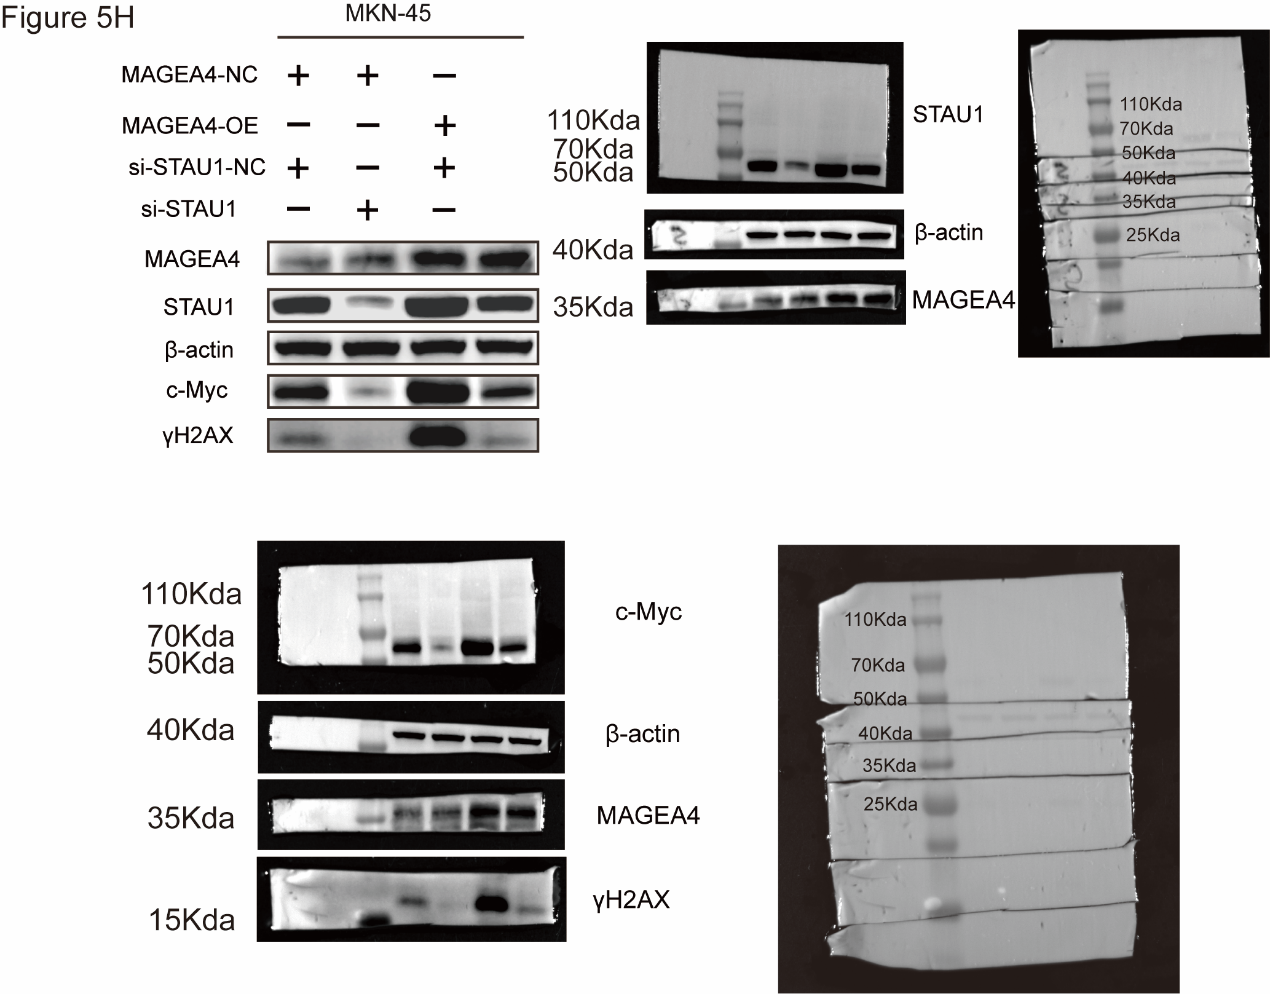

Supplement: Supplementary file 2 [file 98df1473fbf5964ba65a91f6.docx]
